# Supplementary material for: Dielectric behaviors and high energy storage density of nanocomposites with core–shell BaTiO3@TiO2 in poly(vinylidene fluoride-hexafluoropropylene)
Source: Royal Society of Chemistry journal article supplement (doi:10.1039/c3cp52267a), 2013-01-01
Supplement: c3cp52267a.pdf [file c3cp52267a.pdf]

Supporting Information for

## Dielectric behaviors and high energy storage density of nanocomposite with core-shell BaTiO<sub>3</sub>@TiO<sub>2</sub> in poly(vinylidene fluoride-hexafluoropropylene)

Mojtaba Rahimabady<sup>a,b</sup>, Meysam Sharifzadeh Mirshekarloo<sup>a</sup>, Kui Yao<sup>a,\*</sup>, and Li Lu<sup>b</sup>

DOI: 10.1039/b000000x

<sup>a</sup>*Institute of Materials Research and Engineering, A\*STAR (Agency for Science, Technology and Research), Research Link, 117602 (Singapore)*

\**E-mail: (k-yao@imre.a-star.edu.sg)*

<sup>b</sup>*Department of Mechanical Engineering, National University of Singapore, 21 Lower Kent Ridge Road, 119260 (Singapore)*

As shown in Figure S1, XRD pattern of the core-shell nanoparticle powder was consistent with the TEM results of the BaTiO<sub>3</sub> and TiO<sub>2</sub> structures. It should be noted that as the result of the small thickness of the TiO<sub>2</sub> shells, the intensity of the XRD peaks at (210), (111), (211), (102), (112), (122), (321), and (421) that related to TiO<sub>2</sub> (Brookite) structure are very low.

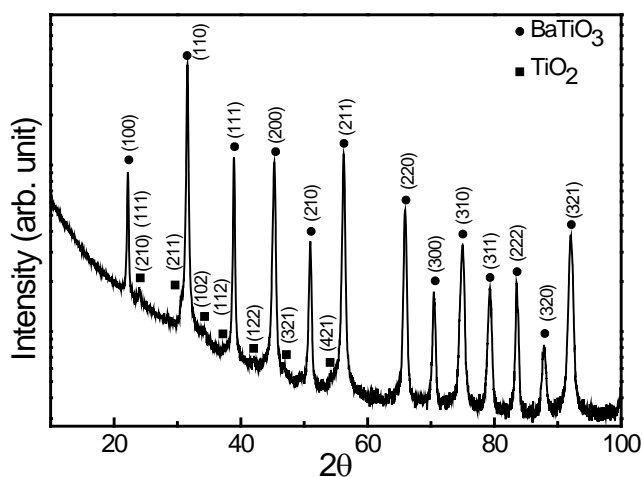

Figure S1. XRD pattern of BT@TiO<sub>2</sub> powder

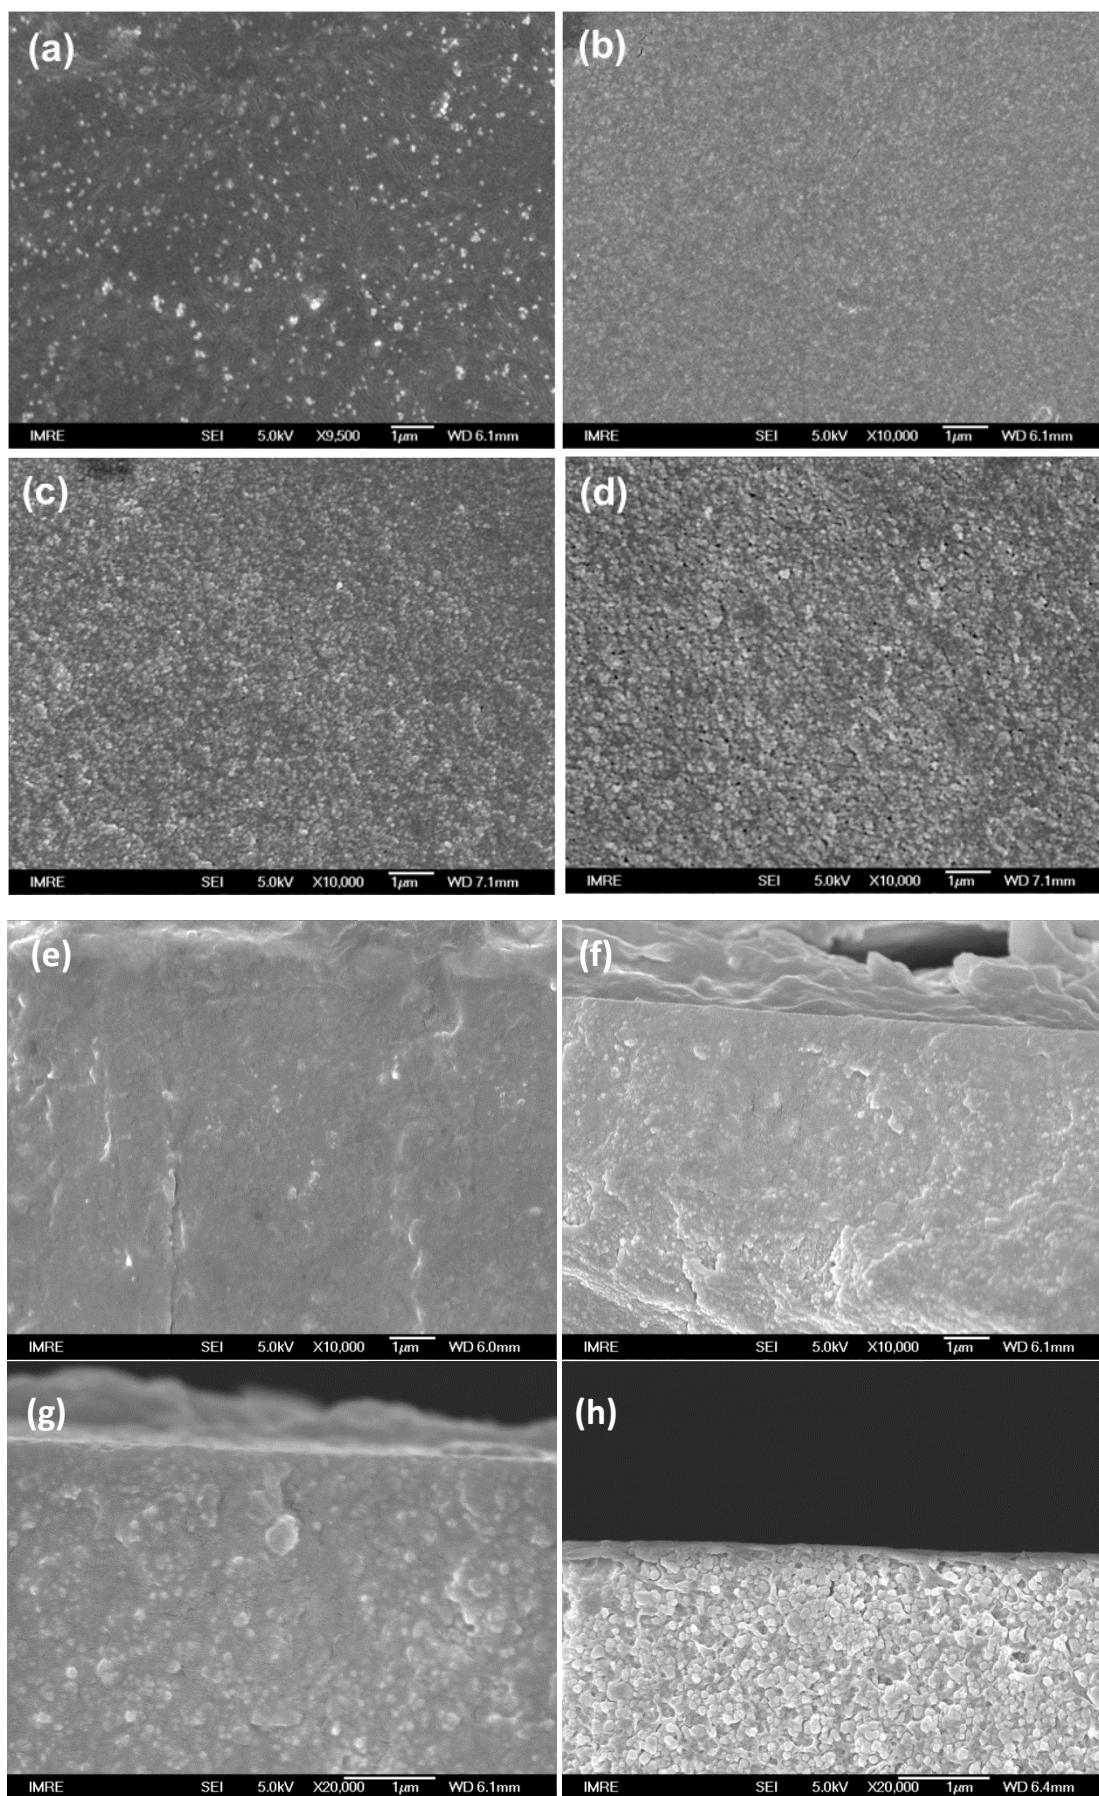

**Figure S2.** FESEM images of the surfaces of P(VDF-HFP)/BT@TiO<sub>2</sub> nanocomposite samples, (a) 10 Vol %, (b) 30 Vol %, (c) 40 Vol %, (d) 50 Vol % BT@TiO<sub>2</sub> core-shell nanoparticle; and freeze-fractured cross-section images with (e) 10 Vol %, (f) 30 Vol %, (g) 40 Vol %, (h) 50 Vol % BT@TiO<sub>2</sub> core-shell nanoparticle.

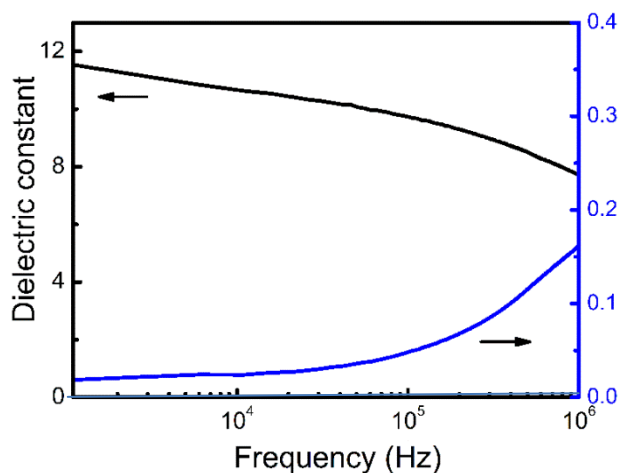

**Figure S3.** Frequency dependent dielectric constant and loss of the pure P(VDF-HFP)

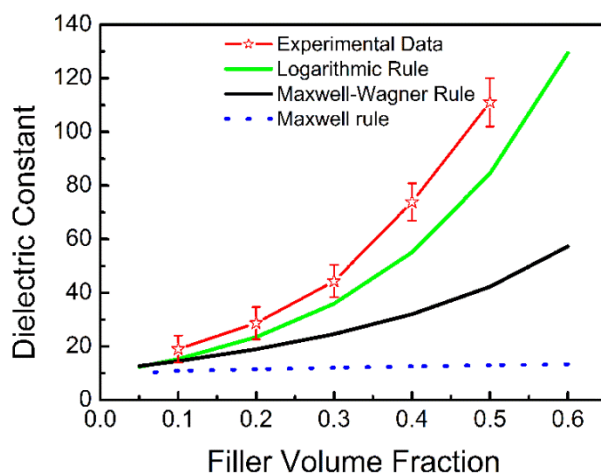

**Figure S4.** Comparison between the calculated dielectric constant according to Maxwell, Maxwell-Wagner and Logarithmic rules with experimental data on P(VDF-HFP)/BT@TiO<sub>2</sub> nanocomposite.

In Vo-Shi model, the effective dielectric constant of the composite, expressed by Equation

(S1)

$$\varepsilon_c = \frac{h + 2l}{h - l} \quad (S1)$$

where

$$h = \left[ 1 + 2 \frac{(\varepsilon_M - \varepsilon_{int})(\varepsilon_{int} - \varepsilon_F)}{(2\varepsilon_M + \varepsilon_{int})(2\varepsilon_{int} + \varepsilon_F)} \frac{a^3}{b^3} - 2 \frac{(\varepsilon_M - 1)(\varepsilon_M - \varepsilon_{int})}{(\varepsilon_M + 2)(2\varepsilon_M + \varepsilon_{int})} \frac{b^3}{c^3} \right. \\ \left. - 2 \frac{(\varepsilon_M - 1)(\varepsilon_M + 2\varepsilon_{int})(\varepsilon_{int} - \varepsilon_F)}{(\varepsilon_M + 2)(2\varepsilon_M + \varepsilon_{int})(2\varepsilon_{int} + \varepsilon_F)} \frac{a^3}{c^3} \right]$$

$$l = \left[ \frac{(\varepsilon_M - 1)}{(\varepsilon_M + 2)} j - \frac{(2\varepsilon_M + 1)m}{(\varepsilon_M + 2)(2\varepsilon_M + \varepsilon_{int})} \frac{b^3}{c^3} \right]$$

and

$$j = \left[ 1 + 2 \frac{(\varepsilon_M - \varepsilon_{int})(\varepsilon_{int} - \varepsilon_F)}{2(\varepsilon_M + \varepsilon_{int})(2\varepsilon_{int} - \varepsilon_F)} \frac{a^3}{b^3} \right]$$

$$m = \left[ (\varepsilon_M - \varepsilon_{int}) + \frac{(\varepsilon_M + 2\varepsilon_{int})(\varepsilon_{int} - \varepsilon_F)}{(2\varepsilon_{int} + \varepsilon_F)} \frac{a^3}{b^3} \right]$$

and

$\varepsilon_c$ ,  $\varepsilon_M$ ,  $\varepsilon_{int}$ , and  $\varepsilon_F$  represent the dielectric constants of composite, matrix, interphase, and filler, respectively.  $a$  is the radius of the filler,  $b - a$  is the thickness of the interphase region, and  $c$  is the radius of the equivalent composite (sphere with radius  $c$  and dielectric constant  $\varepsilon_c$ ).

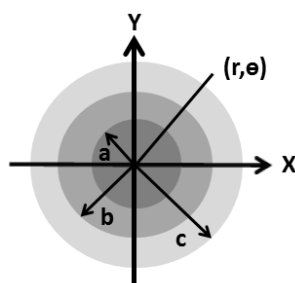

The interphase volume fraction between the filler and the matrix is

$$\phi_{int} = k\phi_F\phi_M$$

$$\frac{a^3}{b^3} = \frac{V_F}{V_{int} + V_F} = \frac{\phi_F}{\phi_{int} + \phi_F} = \frac{(1 + k\phi_F)}{1 + k}$$

$$\frac{a^3}{c^3} = \frac{V_F}{V_C} = \phi_F$$

$$\frac{b^3}{c^3} = \frac{V_F + V_{int}}{V_C} = \phi_F + k\phi_F \frac{(1 - \phi_F)}{(1 + k\phi_F)} = \phi_F \left[ 1 + k \frac{(1 - \phi_F)}{(1 + k\phi_F)} \right]$$

where  $\phi_{int}$ ,  $\phi_F$ ,  $\phi_M$  are volume fractions of interphase, fillers, and polymer, respectively, and  $k$  is the interphase volume constant. This constant reflects the matrix-filler interaction strength. A large positive  $k$  indicates strong polymer-filler interaction. The interphase characteristics may be affected by filler size (surface area), and chemical structure of interphase region that is related to the bonding between polymer and filler.

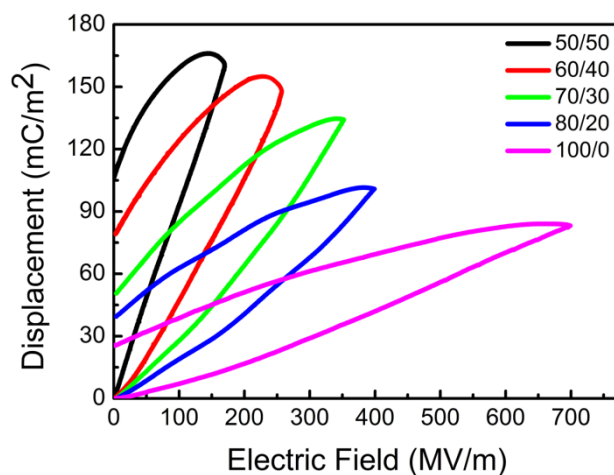

**Figure S5.** Displacement hysteresis loops of the P(VDF-HFP)/BT@TiO<sub>2</sub> nanocomposites with different volume fractions at breakdown field.
